# Supplementary material
Source: PubMed Central journal article supplement (PMC8461293)

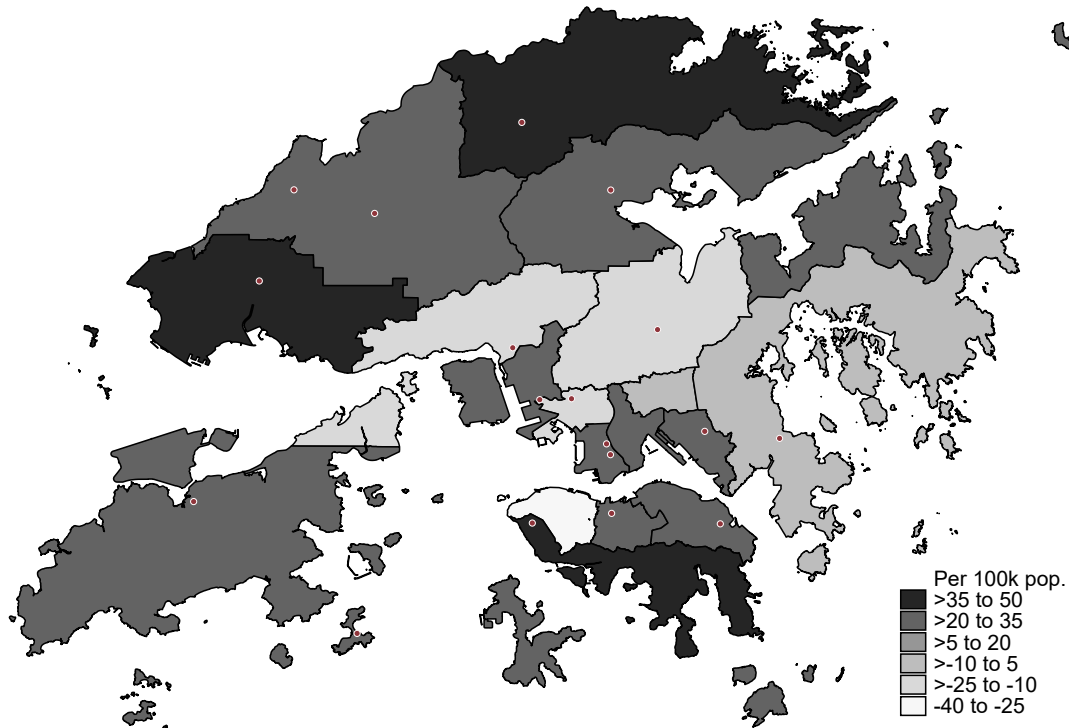

\*Red dots are location of EDs of 18 public hospitals

Supplement: mmc2.pdf [file mmc2.pdf]

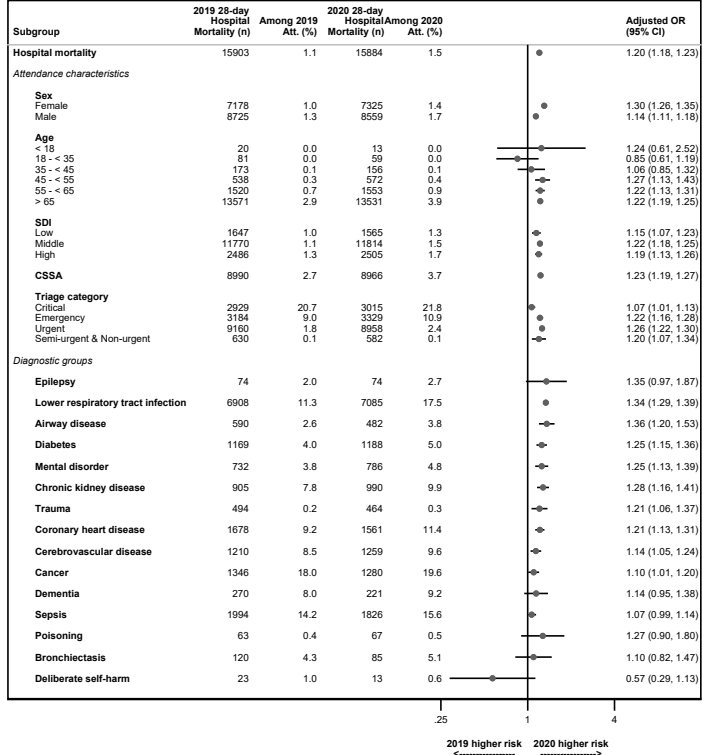

Supplement: mmc3.pdf [file mmc3.pdf]

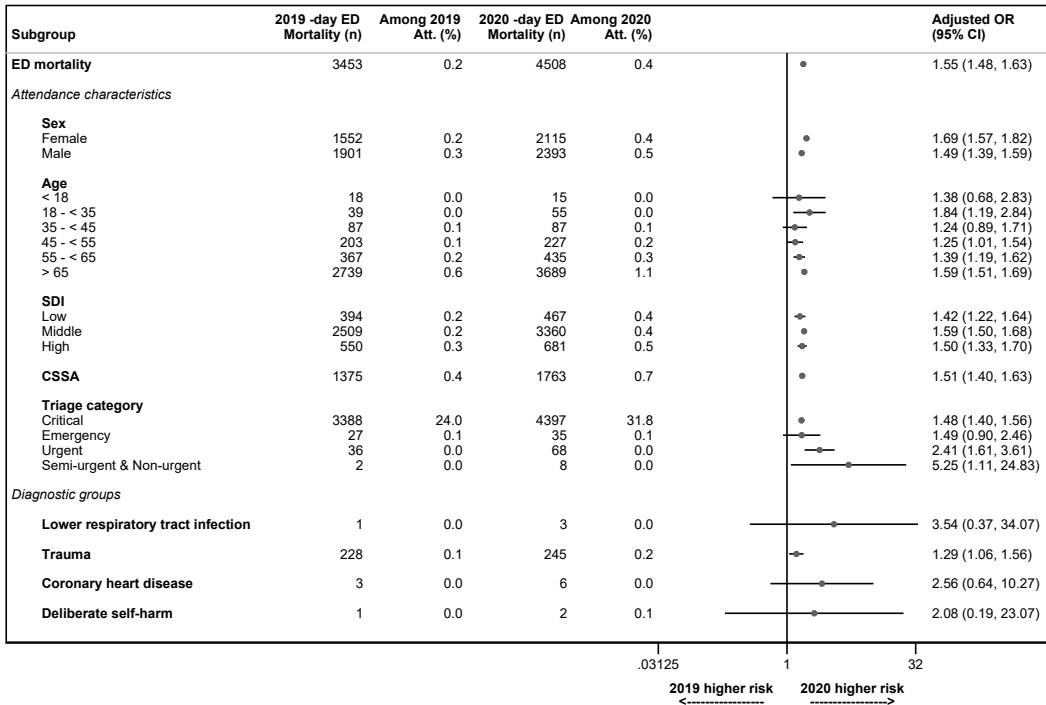

Supplement: mmc4.pdf [file mmc4.pdf]

Cumulative confirmed COVID-19 cases per million people  
from 1/1/2020 to 31/8/2020

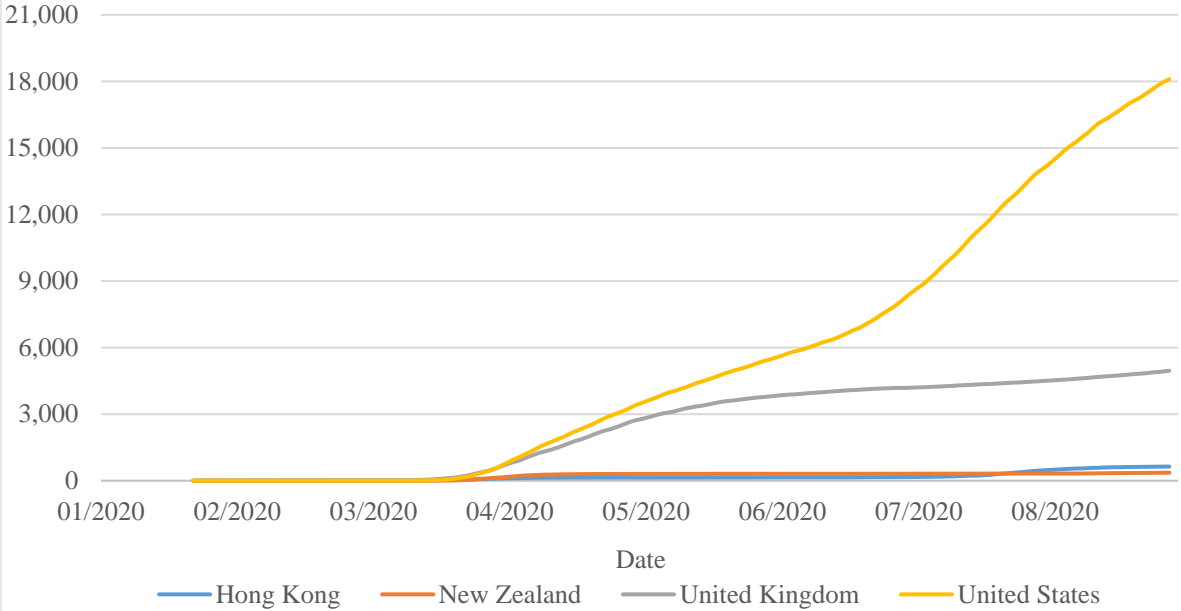

Supplement: mmc5.pdf [file mmc5.pdf]
